# Supplementary material for: NOTCH alteration in EGFR-mutated lung adenocarcinoma leads to histological small-cell carcinoma transformation under EGFR-TKI treatment
Source: PubMed Central journal article supplement — Transl Lung Cancer Res. 2021 Nov;10(11):4161–73. doi: 10.21037/tlcr-21-536 (PMC8674607; doi:10.21037/tlcr-21-536), 2021-11
Supplement: tlcr-10-11-4161-dss.pdf [file tlcr-10-11-4161-dss.pdf]

## Data Sharing Statement

|                     |                                                                                                                                                    |                                                                                                                  |
|---------------------|----------------------------------------------------------------------------------------------------------------------------------------------------|------------------------------------------------------------------------------------------------------------------|
| <b>Article Info</b> | <a href="https://dx.doi.org/10.21037/tlcr-21-536">https://dx.doi.org/10.21037/tlcr-21-536</a>                                                      |                                                                                                                  |
| <b>Item</b>         | <b>Question</b>                                                                                                                                    | <b>Authors' Response<br/>(place "-" if not applicable)</b>                                                       |
| 1                   | Would you like to share data collected for your study to others?                                                                                   | Yes.                                                                                                             |
| 2                   | If not, would you like to share the reason for your decision?                                                                                      | -                                                                                                                |
| 3                   | What data in particular will be shared?                                                                                                            | DNA Sequence data.                                                                                               |
| 4                   | Any other documents will be share? Such as study protocol, statistical analysis plan, informed consent form, clinical study report, analytic code. | None.                                                                                                            |
| 5                   | When will data availability begin?                                                                                                                 | From the publication date.                                                                                       |
| 6                   | When will data availability end?                                                                                                                   | Five years within the publication date.                                                                          |
| 7                   | To whom will you share the data?                                                                                                                   | Oncologist to research lung cancer.                                                                              |
| 8                   | For what type of analysis or purpose?                                                                                                              | For analysis about the resistance mechanisms to EGFR TKI.                                                        |
| 9                   | How or where can the data/documents be obtained?                                                                                                   | Emails could be sent to the address of corresponding author to obtain any additional data.                       |
| 10                  | Any other restrictions?                                                                                                                            | We may balance the potential benefits and risks for each request and then provide the data that could be shared. |
