# Supplementary material for: NOTCH alteration in EGFR-mutated lung adenocarcinoma leads to histological small-cell carcinoma transformation under EGFR-TKI treatment
Source: PubMed Central journal article supplement — Transl Lung Cancer Res. 2021 Nov;10(11):4161–73. doi: 10.21037/tlcr-21-536 (PMC8674607; doi:10.21037/tlcr-21-536), 2021-11
Supplement: tlcr-10-11-4161-supplementary.pdf [file tlcr-10-11-4161-supplementary.pdf]

**Table S1** List of the genes included in the GeneRead™ DNaseq Targeted Panels V2 Human Comprehensive Cancer Panel (QIAGEN)

|        |        |        |          |        |        |         |          |
|--------|--------|--------|----------|--------|--------|---------|----------|
| ABL1   | BUB1B  | DDR2   | FGFR2    | IDH2   | MEN1   | PDGFRA  | SMARCA4  |
| AKT1   | CARD11 | DICER1 | FGFR3    | IKZF1  | MET    | PHF6    | SMARCB1  |
| AKT2   | CBL    | DNMT3A | FH       | IL6ST  | MLH1   | PIK3CA  | SMO      |
| ALK    | CBLB   | ECT2L  | FLCN     | IL7R   | MSH2   | PIK3R1  | SPOP     |
| AMER1  | CD79A  | EGFR   | FLT3     | JAK1   | MSH6   | PMS2    | SRC      |
| APC    | CD79B  | EP300  | FUBP1    | JAK2   | MTOR   | PPP2R1A | STK11    |
| AR     | CDC73  | EPCAM  | GATA1    | JAK3   | MUTYH  | PRDM1   | SUFU     |
| ARID1A | CDH1   | ERBB2  | GATA2    | KDM6A  | MYC    | PRKAR1A | TERT     |
| ARID2  | CDK12  | ERBB3  | GATA3    | KDR    | MYD88  | PTCH1   | TNFAIP3  |
| ASXL1  | CDK4   | ERBB4  | GNA11    | KIT    | NF1    | PTEN    | TNFRSF14 |
| ATM    | CDKN2A | ERCC5  | GNAQ     | KLF6   | NF2    | PTPN11  | TP53     |
| ATRX   | CHEK2  | ESR1   | GNAS     | KMT2D  | NFE2L2 | PAC1    | TSC1     |
| BAP1   | CIC    | EZH2   | GPC3     | KRAS   | NFKBIA | RB1     | TSC2     |
| BCL6   | CREBBP | FAM46C | GRIN2A   | MAP2K1 | NOTCH1 | RET     | TSHR     |
| BCOR   | CRLF2  | FANCA  | H3F3A    | MAP2K2 | NOTCH2 | ROS1    | U2AF1    |
| BRAF   | CSF1R  | FANCD2 | HIST1H3B | MAP2K4 | NPM1   | SDHB    | VHL      |
| BRCA1  | CTNNB1 | FANCE  | HNF1A    | MAP3K1 | NRAS   | SETD2   | WT1      |
| BRCA2  | CYLD   | FAS    | HRAS     | MAP4K3 | PALB2  | SF3B1   | XPC      |
| BRIP1  | DAXX   | FBXO11 | HSPH1    | MDM2   | PAX5   | SLC7A8  | ZNF2     |
| BTK    | DDB2   | FBXW7  | IDH1     | MED12  | PBRM1  | SMAD4   | ZRSR2    |

**Table S2** The sequences for reverse transcriptase-PCR

---

|        |   |                          |
|--------|---|--------------------------|
| ASCL1  | F | GGTGCGAATGGACTTTGGAA     |
|        | R | GGCATGCCTCGCTTAGTTG      |
| CSF1R  | F | CCAGCACGAGAACATCGTCAA    |
|        | R | AGACGGTCGCCATAGCAACAG    |
| JAK1   | F | TGCCACCTAACTGTCCAGATG    |
|        | R | TGAAAGCTTGTCGATTGGATG    |
| MAP2K2 | F | GGCCATCTTTGAACTCCTGGACTA |
|        | R | AACACACCGTTGGGCAGCTTA    |
| MTOR   | F | GGCCTGGATGGCAACTACAGA    |
|        | R | TGACTGGCCAGCAGAGTAGGAA   |
| NOTCH1 | F | AAGCTGCATCCAGAGGCAAAC    |
|        | R | TGGCATACACACTCCGAACACA   |
| NOTCH2 | F | CCTGGGCTATACTGGGAGCTACTG |
|        | R | ACACCCTGATAGCCTGGGACAC   |
| GAPDH  | F | GCACCGTCAAGGCTGAGAAC     |
|        | R | TGGTGAAGACGCCAGTGGA      |

---

Abbreviations: F, forward primer; R, reverse primer.

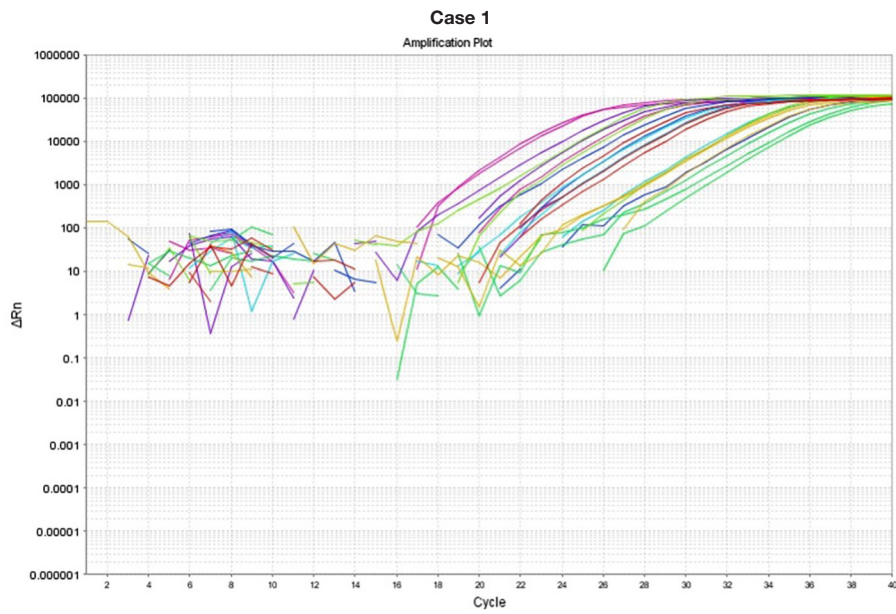

**Figure S1** Real-time reverse transcriptase-PCR curve for case 1.

**Table S3** Genetic alterations about PIK3 and AKT

| Case   | additive/lost | Gene Name | Chrom    | Position GRCh37 | COSMIC ID | Reference | Variant  | Variant Type | Codon Change | Amino Acid Change | snpEff effect     |                       |
|--------|---------------|-----------|----------|-----------------|-----------|-----------|----------|--------------|--------------|-------------------|-------------------|-----------------------|
| 1      | additive      | PIK3CA    | chr3     | 178916573       | -         | T         | <DEL>    | CNV          | -            | -                 | Splice site donor |                       |
|        | lost          | PIK3R1    | chr5     | 67576349        | -         | C         | T        | SNP          |              |                   |                   | INTRON                |
|        |               | AKT1      | chr14    | 105239146       | -         | C         | G        | SNP          |              |                   |                   | INTRON                |
|        |               | AKT1      | chr14    | 105239192       | -         | T         | C        | SNP          |              |                   |                   | INTRON                |
|        |               | AKT1      | chr14    | 105239610       | -         | G         | A        | SNP          | c.935C>T     | p.T312I           |                   | NON_SYNONYMOUS_CODING |
|        |               | AKT1      | chr14    | 105239612       | -         | G         | A        | SNP          | c.933C>T     | p.G311            |                   | SYNONYMOUS_CODING     |
|        |               | AKT1      | chr14    | 105243220       | -         | G         | A        | SNP          |              |                   |                   | INTRON                |
|        |               | AKT1      | chr14    | 105246325       | -         | T         | A        | SNP          |              |                   |                   | INTRON                |
|        |               | AKT1      | chr14    | 105246407       | -         | G         | A        | SNP          |              |                   |                   | INTRON                |
|        |               | AKT2      | chr19    | 40740892        | -         | C         | <DUP>    | CNV          |              |                   |                   | INTRON                |
|        |               | AKT2      | chr19    | 40741991        | -         | A         | G        | SNP          | c.981T>C     | p.Y327            |                   | SYNONYMOUS_CODING     |
|        | AKT2          | chr19     | 40742079 | -               | G         | A         | SNP      |              |              |                   | INTRON            |                       |
|        | 2             | additive  | PIK3R1   | chr5            | 67589343  | -         | G        | A            | SNP          | -                 | -                 | INTRON                |
| PIK3R1 |               |           | chr5     | 67590959        | -         | G         | A        | SNP          | -            | -                 | INTRON            |                       |
| AKT1   |               |           | chr14    | 105236654       | -         | C         | T        | SNP          | -            | -                 | UTR_3_PRIME       |                       |
| AKT1   |               |           | chr14    | 105239611       | -         | T         | C        | SNP          | c.934A>G     | p.T312A           |                   | NON_SYNONYMOUS_CODING |
| AKT1   |               |           | chr14    | 105241997       | -         | G         | A        | SNP          | c.427C>T     | p.H143Y           |                   | NON_SYNONYMOUS_CODING |
| AKT1   |               |           | chr14    | 105246373       | -         | G         | A        | SNP          | -            | -                 |                   | INTRON                |
| AKT2   |               |           | chr19    | 40741103        | -         | T         | A        | SNP          | -            | -                 |                   | INTRON                |
| AKT2   |               |           | chr19    | 40741302        | -         | G         | A        | SNP          | -            | -                 |                   | INTRON                |
| AKT2   |               |           | chr19    | 40741743        | -         | G         | A        | SNP          | -            | -                 |                   | INTRON                |
| AKT2   |               |           | chr19    | 40742145        | -         | C         | T        | SNP          | -            | -                 |                   | INTRON                |
| AKT2   |               |           | chr19    | 40742361        | -         | C         | T        | SNP          | -            | -                 |                   | INTRON                |
| AKT2   |               |           | chr19    | 40743834        | -         | G         | A        | SNP          | -            | -                 |                   | INTRON                |
| AKT2   |               |           | chr19    | 40744956        | -         | G         | A        | SNP          | -            | -                 |                   | INTRON                |
| AKT2   |               |           | chr19    | 40747984        | -         | G         | A        | SNP          | -            | -                 |                   | INTRON                |
| AKT2   |               |           | chr19    | 40771143        | -         | C         | T        | SNP          | c.32G>A      | p.W11*            |                   | STOP_GAINED           |
| AKT2   |               |           | chr19    | 40771178        | -         | G         | A        | SNP          | -            | -                 |                   | UTR_5_PRIME           |
| AKT2   |               |           | chr19    | 40771190        | -         | C         | T        | SNP          | -            | -                 |                   | UTR_5_PRIME           |
| lost   |               |           | PIK3R1   | chr5            | 67522481  | -         | T        | <DUP>        | CNV          |                   |                   |                       |
|        |               | PIK3R1    | chr5     | 67522722        | -         | C         | T        | SNP          | c.219C>T     | p.Y73             |                   | SYNONYMOUS_CODING     |
|        |               | AKT2      | chr19    | 40741991        | -         | A         | G        | SNP          | c.981T>C     | p.Y327            |                   | SYNONYMOUS_CODING     |
| 3      | additive      | PIK3R1    | chr5     | 67522481        | -         | T         | <DUP>    | CNV          | -            | -                 | UTR_5_PRIME       |                       |
|        |               | AKT1      | chr14    | 105236653       | -         | T         | <DUP>    | CNV          | -            | -                 | UTR_3_PRIME       |                       |
|        | lost          | PIK3CA    | chr3     | 178916573       | -         | T         | <DEL>    | CNV          |              |                   |                   | SPLICE_SITE_DONOR     |
|        |               | PIK3CA    | chr3     | 178948034       | -         | C         | T        | SNP          | c.2806C>T    | p.H936Y           |                   | NON_SYNONYMOUS_CODING |
|        |               | AKT1      | chr14    | 105239610       | -         | G         | A        | SNP          | c.935C>T     | p.T312I           |                   | NON_SYNONYMOUS_CODING |
|        |               | AKT1      | chr14    | 105258972       | -         | G         | A        | SNP          | c.9C>T       | p.D3              |                   | SYNONYMOUS_CODING     |
| AKT2   | chr19         | 40741991  | -        | A               | G         | SNP       | c.981T>C | p.Y327       |              | SYNONYMOUS_CODING |                   |                       |

**Table S4** Comparison of copy number variation between adenocarcinoma and small-cell carcinoma

| Case | Gene name     | chr No. | copy number    |                      |           |
|------|---------------|---------|----------------|----------------------|-----------|
|      |               |         | adenocarcinoma | small cell carcinoma | remainder |
| 1    | <i>KLF6</i>   | chr10   | 4.16           | 1.53                 | -2.63     |
|      | <i>HRAS</i>   | chr11   | 15.03          | 4.33                 | -10.7     |
|      | <i>NFKBIA</i> | chr14   | 20.79          | 9.72                 | -11.07    |
|      | <i>GNAS.1</i> | chr20   | 21.52          | 12.65                | -8.87     |
|      | <i>RB1</i>    | chr13   | 2.48           | 2.9                  | 0.42      |
|      | <i>TP53</i>   | chr17   | 2.76           | 2.26                 | -0.5      |
| 2    | <i>KLF6</i>   | chr10   | 2.91           | 5.8                  | 2.89      |
|      | <i>HRAS</i>   | chr11   | 6.7            | 21.6                 | 14.9      |
|      | <i>NFKBIA</i> | chr14   | 7.88           | 43.74                | 35.86     |
|      | <i>GNAS.1</i> | chr20   | 5.32           | 12.39                | 7.07      |
|      | <i>RB1</i>    | chr13   | 0.97           | 0.7                  | -0.27     |
|      | <i>TP53</i>   | chr17   | 2.59           | 4.67                 | 2.08      |
| 3    | <i>KLF6</i>   | chr10   | 4.9            | 1.27                 | -3.63     |
|      | <i>HRAS</i>   | chr11   | 9.76           | 2.67                 | -7.09     |
|      | <i>NFKBIA</i> | chr14   | 8.51           | 3.32                 | -5.19     |
|      | <i>GNAS.1</i> | chr20   | 17.35          | 2.08                 | -15.27    |
|      | <i>RB1</i>    | chr13   | 1.39           | 1.92                 | 0.53      |
|      | <i>TP53</i>   | chr17   | 2.71           | 1.81                 | -0.9      |
